# Supplementary material
Source: PubMed Central journal article supplement (PMC4298190)
Supplement: rsbl20140809supp2.pdf [file rsbl20140809supp2.pdf]

>Python

```
-----  
-----AGTTCCTGC  
---CTGTTGTTGGAA---AGCACTAGCCCACCACAGTCC---ACA-----ACCACA  
---GCAACTGTAGTGTCTACC-----TCATCCACA-----  
-----  
-----  
-----  
-----  
-----  
-----  
-----  
-----  
-----
```

>Python\_regius

```
-----  
-----AGTGCCACAGAAATGTATGTTAAGAAA---GAGAACAATGCCAACAGTTCCTGC  
---CTGTTGTTGGAA---AGCACTAGCCCACCACAGTCC---ACA-----ACCACA  
---GCAACTGTAGTGTCTACC-----TCATCCACA-----  
-----  
-----  
-----  
-----  
-----  
-----  
-----
```

>Trimeresurus\_flavoviridis

```
TGCCAGTGTAATAAATGCAGCTTGATCGCCGAGAGGCAACGGGTGATGGCCGCCAGGTT  
---GCGTTGAGAAGACAACAAGCCCAAGAGGAAGAGCTGGGGATTAGTCACCCCATCCCT  
TTGCCTAGCGCCACAGAAATGTATGTGAAGAAA---GAAAACAACGCCAACAGTTCCTGC  
---CTGTTG---GAA---AGCACCAGCCCACCACAATCA---ACA-----ACCACA  
---GCAACTGTAGTATCTACC-----TCATCCACAGAAGGACGGATGCTGATTCAAGAC  
ATTCCATCCCTGGCCAGCAGAGGGCATCTGGAGAGCACATCTGACTTAGTTATGGATCCC  
ACCTACTACAGCAGTTTATACCAGCCATCCTTGTATCCTTATTACAACAAC-----  
-----CTTTACAAC TATTCTCAGTATCAAATGGCTGTGGCCACTGAAACCACCTCTGGT  
---GATATGGGAAGCCCACTGACAGGGTCACTGTGTTAAGAGCAGCCTCCGAAGCCTCCCA  
ACAAC TTATATGTCAAGCCAGTCGGGAAACCAATGGCAGGTGAAAAGCCGAGAAGGTCCG  
-----CAC-----AGCTTGAGTTCCAGTACAGGATGCATTCTTACTATCCCTCC  
GGCTCTTACTTGGGACAAAGTGTGGGGGCCCTGCCTGTGTTCCCCAAATTTTTACTTTT  
GAGGAGAATCCTTCTTACTCCGAAACAAAAACAAAT
```

>Elaphe\_quadrivirgata

```
TGCCAGTGTAATAAATGCAGCTTGATCGCCGAGAGGCAACGGGTGATGGCCGCCAGGTT  
---GCATTGAGAAGACAACAAGCCCAAGAGGAAGAGCTGGGGATTAGCCACCCCATCCCA  
TTGCCTAGCGCCACAGAAATGTATGTGAAGAAA---GAAAACAATGCTAACAGTTCCTGC  
---CTGTTG---GAA---AGCACCAGCCCACCCAGTCG---ACA-----ACCACA  
---GCAACTGTAGTGTCTACC-----TCATCCACAGAAGGACGGATGCTGATTCAAGAC  
ATTCTTCCCTGGCCAGCAGAGGGCATCTGGAGAGCACATCTGACTTAGTTATGGACCC  
ACCTACTACAGCAGTTTATACCAGCCATCCTTGTATCCTTATTACAACAAC-----  
-----CTGTACAAC TATTCTCAGTACCAAATGGCTGTGGCCACCGAAACCACCTCTGGT  
---GATATGGGAAGCCCAATTGTCAGGGTCACTGTGTTAAGAGCAGCCTCCGAAGCCTCCCA  
ACAAC TTATATGTCAAGCCAGTCGGGAAACCAATGGCAGGTGAAAAGCCGGAAGGTCCG  
-----CAC-----AGCTTGAGTTCCAGTACAGGATGCATTCTTACTATCCCTCC  
AGCTCTTACTTGGGACAGAGTGTGGGGGCCCTGCCTGTGTTCCCCAAATTTTTACTTTT
```

GAGGAGAATCCTTCTTACTCTGACACAAAAGCAAAT

>Notechis\_scutatus

TGCCAGTGTAATAAATGCAGCTTGATCGCCGAGAGGCAACGGGTGATGGCCGCCAGGTT  
---GCGTTGAGAAGACAACAAGCCCAAGAGGAAGAGCTGGGGATCAGCCACCCCATCCCA  
TTGCCTAGCACCACAGAAATGTATGTGAAGAAA---GAGAACAACGCTAACAGTTCCTGC  
---CTGCTG---GAA---AGCACCAGCCCACCCAGTCG---ACC-----ACCACA  
---GCAACTGTAGTGTCTACC-----TCATCCACAGAAGGACGGATGCTGATTCAAGAC  
ATTCCTTCCCTGGCCAGCAGAGGGCATCTGGAGAGCACATCTGACTTAGTTATGGACCCC  
ACCTACTACAGCAGTTTATACCAGCCATCCCTGTATCCTTATTACAACAAC-----  
-----CTCTACAAC TATTCTCAGTATCAAATGGCTGTGGCCACCGAAAACCACCTCCGGT  
---GATATGGGAAGCCATTGACAGGGTCACTGTTAAGAGCAGCCTCCGAAGCCTCCCA  
ACCACTTATATGTCAAGCCAGTCAGGAAACCAATGGCAGGTGAAAAACCCAGAAGGCCGG  
-----CAC-----AGCTTGAGTTCCTAATACAGGATGCATTCTACTATCCTTCC  
AGCTCTTACTTGGGACAGAGTGTGGAGCCCTGCTTGTGTTCCCCAAATTTTTACTTTCC  
GAGGAGAATCCTTCTTACTCTGAAACAAAAGCAAAT

>Ctenotus\_taenioulatus

-----  
-----  
-----GAAGTGTATGTAAAGAAA---GAGAACAATGCCAATGGTTCCTGC  
CTATTGCTG---GAA---AGCAGCAGCCCACCCAGTCCACGACT-----GCA  
---GCAACCACCGCTCTGCC-----TCATCCACA-----  
-----  
-----  
-----  
-----  
-----  
-----  
-----  
-----

>Eulamprus\_quoyii

-----  
-----  
-----GAAGTGTATGTGAAGAAA---GAGAGCAATGCCAATGGTTCCTGC  
CTATTGCTG---GAA---AGCAGCAGCCCACCCAATCCACGACT-----GCA  
---GCAACCACCGCTCTGCC-----TCATCCACA-----  
-----  
-----  
-----  
-----  
-----  
-----  
-----

>Eublepharis\_macularius

-----  
-----  
-----AGTGCCACAGAAATGTATGTGAAGAAA---GAGAGCAATGCAAATGGATCCTGC  
TTATTGATG---GAG---AGCGGCAGCCCCACACAGTCCACAACA-----ACCATG  
---GCAGCCACAGGGTCGGCC-----TCAGTGACA-----  
-----  
-----  
-----  
-----  
-----  
-----

-----  
-----  
>Gekko\_hokouensis  
-----

---GCCCTGAGAAGGCAGCAAGCTCAAGAGGAAGAACTGGGCATCAGCCACCCTATCCCT  
TTGCCGAGTGCCACAGAAATGTACATGAAGAAA---GAGAACAATGCCAATGGGTCTCTGC  
TTGCTGCTG---GAG---AGCAGCAGCCCCCACAGTCCACGACA-----ACCACA  
---GCAACCTCAGGGGCGGCC-----TCATCAACAGAGGGACGGATGCTCATGCAGGAC  
ATTCTTCTCTGAGCAGCAGAGGGCATCTGGAGAGCACATCTGATTTAGTTGTGGACTCC  
ACCTACTACAGCAGTTTTTACCAGCCT---TTGTATCCTTACTACAACAAC-----  
-----TTATACAATACTCCCAGTACCAGATGGCTGTGTCCAGTGAAAACCACCTCTGGA  
---GACATGGGGAGCTCCTTGGTAGGATCTCCTGCTAAAAACAGCCTCCGAAGCCTTCCA  
GCAACTTATATGTCAAGCCAGTCAGGAAACCAGTGGCAGGTAAAAAGCCAGACAGCCGT  
-----CAT-----GGTATGAGTTCCAGTATAGGATGCATACTTACTACCCCCC  
ACCTCCTACTTGGGCCAGAGTGTGGCACCCCTGCCTGTGTTCCTCCAGATTTTGACTTTT  
GAGGAGAGTCTTCTCTCTGAAACAAAAGCCAGT

>Calotes\_versicolor

TGCCAGTGCAAAAAATGCAGCTTGATCGCCGAGAGGCAGCGGGTGATGGCCGCCAGGTT  
---GCTCTGAGAAGGCAGCAAGCCCAAGAGGAAGAGTTGGGGATCAGCCACCCATCCCC  
TTGCCG-----GAAATGTATGTGAAGAAG---GAGAGCAATGCCAGCGGCACCTGC  
CTTGTGTTG---GAA---GGGGCAGCCCCCACCGTCG---ACC-----TCCACG  
---GCAACTGCAGGCTCATCT-----GCAGCAACAGAGGGACGGATGTTGATCCCGGAC  
CTTCTTCCCTGTCCAGCAGAGGGCATCTGGAGAGCACATCTGATTTAGTCGTGGACTCC  
ACCTACTACAGCAGTTTTTACCAGCCTCCTTATATCCGTAATAACAACAAC-----  
-----CTCTACAATACTCTCAGTACCAGATGGCTGTGGCCAGTGAAAAGCACCTCTGGA  
---GAGATGGGGAGCCACTGGTAGGATCGCCAGTTAAAAACAGCCTTGCGAAGCCTCCCA  
GCGACCTATATGTCAAGCCAGTCAGGAAACCAGTGGCAGGTGAAGAGTCCAGACAACCGC  
-----CAT-----GCCATGGGCTCCAGTACAGGATGCACTCATACTAC-----  
-----

-----  
-----  
>Pogona\_vitticeps

TGCCAGTGCAAAAAATGCAGCTTGATCGCGGAGAGGCAGCGGGTGATGGCAGCCAGGTT  
---GCACTGAGAAGGCAGCAAGCCCAAGAAGAAGAGTTGGGCATCAGCCACCCATCCCC  
TTGCCA-----GAAATGTATGTGAAGAAA---GAGAGCAATGCCAGCGGCACCTGC  
CTTGTGTTG---GAA---AGTGGCAGCCCTCCACCGTCT---ACT-----TCCTCG  
---GCAACTGCAGGCTCATCT-----GCAACAACAGAGGGACGGATGTTGATCCCGGAC  
ATTCTTCCCTGTCCAGCAGAGGGCATCTGGAGAGCACATCTGATTTAGTCGTGGACTCC  
ACCTACTACAGCAGTTTTTACCAGCCATCGTTGTATCCTTACTACAATAAC-----  
-----CTCTACAATACTCTCAGTACCAGATGGCTGTGGCCAGTGAAAACCACCTCTGGA  
---GAGATGGGGAGCCACTGGTAGGATCTTCAGTTAAAAACAGCCTGCGAAGCCTCCCG  
GCAACCTATATGTCAAGCCAGTCAGGAAACCAGTGGCAGGTGAAGAGTCCAGACAACCGC  
-----CAT-----GGCGTGAGTTCCAGTACCGGATGCATTCTTACTATCCTTCC  
ACCCCTTATTTGGGCCAGAATGTTGGGGCTCCTGCCTGTGTCCCCAGATTTTCACTTTT  
GAAGAGAGTCCCCGTACTCTGAAGCAAAAAGCAAAT

>Leiolepis\_reevesii

-----  
-----  
---GCACTGAGGAGGCAGCAAGCTCAAGAAGAAGAGTTGGGAATCAGCCTCCCCATCCCC  
TTGCCCT-----GAAATGTATGTCAAGAAA---GAGAACAAGTTCCAGCGGCACCTGC  
CTTGTGCTG---GAA---AATGGAAGCCACCACATTCT---AGT-----TCCTCT  
---GCGGCGGCAAGCTCAGCC-----ACAACCCAGAAAGGACGGATGTTGATCCCGGAC  
ATTCTTCCCTGTCCAGCAGAGGGCATCTGGAGAGCACATCTGATTTAGTCGTGGACTCC  
ACCTACTACAGCAGTTTTTACCAGCCGTCCTTGTATCCTTACTACAATAAC-----  
-----CTGTACAATACTCCCAGTACCAGATGGCTGTGGCCAGCGAAAACCTACCTCAGGA  
---GATATGGGGAGCTCACTGGTAGGATCCCCAGTTAAAAACAGCCTGCGAAGCCTCCCA  
GCAACCTATATGTCAAGCCAGTCAGGAAAGCCAGTGGCAGGTGAAGAGTCCAGACGGCCGC

-----CAT-----GGCGTGAGTTCCAGTACCGGATGCATTCTACTATCCTTCC  
ACGTCCTATTTGGGCCAGAATGTCGGAGCTCCTGCCTGCGTCCCCAGATTTTCACTTTT  
GAAGAGAGCCCATCATACTCTGAAACAAAAGCAAGT

>Anolis\_carolinensis

TGCCAGTGCAAGAAGTGCAGCCTCATCGCCGAGAGGCAGCGGGTCATGGCTGCCAGGTT  
---GCACTGAGAAGGCAGCAAGCTCAAGAGGAGGAGCTGGGGATCAGCCACCCCATCCCT  
TTGCCAATGCCACAGAAATGTATGTGAAGAAA---GAGGGCAGCGCAAATGGCTCTTGC  
CTGTTGTTG---GAA---AGCAGCAGCCACAGCAATCC---ACA-----ACTGCA  
---GCTACCACAGTGTCTAGT-----GCATCCACAGAGGGACGGATGCTGATCCAGGAC  
ATTCCCTCCCTGGCCAGCAGAGGGCATCTGGAGAGCACATCTGACTTAGTTGTGGACTCC  
ACCTACTACAGCAGTTTTTACCAGCCTTCCCTTGTATCCTTACTACAACAAC-----  
-----CTGTACAACACTCTCAGTACCAGATGGCTGTGGCCAGTGAAACTACTTCTGGC  
---GATATGGGGAGCCCTCTGGTGGGATCCCCAGTTAAAAACAGCCTCCGAAGCCTCCCA  
ACAACATACATGTCAAGCCAGTCAGGAAACCAATGGCAGGTGAAAAGCCCTGAGAACCGC  
-----CAT-----GGCGTGAGTTCCAGTACAGGATGCATTCTTACTATCCTTCT  
ACTTCTACTTGGGACAGAGCGTTGGGGGCCCTGCTTGTGTCCCACAGATCTTCACTTTT  
GAGGAGAGTTCTTACTCAGAAACAAAAGGCAAAT

>Aspidoscelis\_inornata

TGCAGGTGCGAAAAGTGCATCCTGATCGCCGAGAGGCAGCGGTGATGGCCGCGCAGGTT  
---GCGCTGAGGAGGCAGCAAGCCCAAGAGGAGGAAGTGGGGATCAGCCATCTCATTCCC  
CTGCCTAGTGCCACAGAAAAGTTTGTCAAGAAA---GAAAACAGTACAAATGGCTCCTGC  
CTGCAGCTG---GAC---AACAGCAGCCCGCCTCAA-----ACT  
---GCAACCACCGGGTCTGGG-----TCATCCGCAGAGGGACGGATGCTGATACAAGAC  
ATTCTTCCCTGACCAGCAGAGGGCACCTGGAAAGCACATCTGATTTGGTTGTGGAC---  
-----TACAGCAGTTTTTACCAGCCATCCCTGTATCCTTACTATAACAACACTATCCCAG  
TACCAGATGTACAGCTACTCCCAGTACCAGATGGCTATGGCCAGTGAAACTACTTCTGGA  
---GACGTGGGAAGCCCACTGGTAGGGTCTCCTGTTAAAAACAGCCTCCGAAGCCTCCCA  
TCAACTTATATGCCAAGCCAGTCAGGAAACAGTGGCAGATGAAGACCATGGAGAACCGG  
-----  
-----

>Sphenodon\_punctatus

TGTCAGTGTGAAAAATGCCGTCTGATCGCCGAGAGGCAGCGGGTATGGCAGCACAGGTT  
---GCATTAAGAAGGCAGCAGGCCAGGAAGAGGAGATGGGAATCAACCGTCCAGTCCCG  
CTGACCAGTGCCACAGAAATGTATGTGGAGAAG---GAAGAGAATGGGAGAAGCTCCTGC  
CTGCTGTTG---AAA---ACCAGCAGTCCAACACAGTCA---ACA-----AACACA  
---GCAACTACGGTGTCCACCGTGCCGTC---GGACGGATGCTGATTCAGGAC  
ATTCCCTCCATCACCAGCAGAGGGCATCTGGAGAGCACATCTGACTTGGTTGTGGACTCC  
ACCTACTACAGCAGTTTTTACCAGCCATCCCTGTATCCTTACTACAACAAC-----  
-----CTGTACAACACTACCCCAAGTACCAGATGGCAGTGGCCACCGACTCCTCCTCCAGT  
---GATCTGGGGAGTACCCTTGTAGGGTCCCCTGTGAAAAACAGCCTCCGTACTCTCCCA  
GCAACTTATATGTCCAGCCAGTCAGGAAACAGTGGCAGGTGAAAAGCCAGAGAGCCGT  
-----CAT---GCTGCCATGGGCTCCCAGTACAGGATGCATTCTTACTATCCTCCT  
GCTTCTACTTGGGCCAGAGTGTGGGGGCCCACTTGTGTTCCACAGATCTTCACTTTT  
GAGGAGAGCCCTCTTACTCAGAATCAAAAGCAAAC

>Monodelphis\_domestica

TGCCAGTGCAAGAAGTGCATCTGATCGCAGAGAGGCAGCGGGTCATGGCCGCCAGGTTG  
---GCACTGAGAAGGCAGCAGGCCAGGAGGAGGAGCTGGGGATCAGCCACCCCATTTCC  
CTGCCCAGCGCTGCAGAAGTGTGGTGAAGAGA---GAGAACAATGGCAGCAGCTCATGC  
CTGATGTCTG---GAG---AGCAGCAGCCCCACGCAGGCC---CCT-----AGCACT  
---CCCACC-----ACA-----TCT---TCAGAGGGTTCGTATGGTCATTCAAGAC  
ATCCCTTCGGTACCAGCAGAGGGCACCTGGAGAACACATCTGACCTGGTCTCCGATTCC  
ACCTATTACGGCAGTTTTTACCAGCCCTCTCTCTTTCCATACTACAACAAT-----  
-----CTGTACAACACTACCCCAAGTATTCGATGGCCTTGGCCGCTGATTCCTTCTTCTGGG  
---GAAAATGGGGAGTACACTTGGGGGATCCCCAGTAAAAACAGCCTTCGGAGCCTACCA

GCGACTTATGTGTCTGGCCAGTCAGGAAACCAGTGGCAGATGAAGAACACTGAGAATCGT  
-----CAC-----GGCATGGGTTCAGTATAGGATGCATTCTACTATCCTGCT  
ACTTCTACCTGAGCCAGAGTGTGTGCGAG-----ATCTTTGCTTTT  
GAAGACAGCCCTTCTATTCTGAGGCAAAAGCAAGT

>*Sarcophilus\_harrisii*

TGCCAGTGCAAGAAGTGCAACCTGATCGCCGAGAGGCAGCGGGTCATGGCCGCTCAGGTG  
---GCATTGAGAAGGCAGCAAGCACAGGAGGAGGCTCGGGATCAGCCATCCTATTCCC  
TTGCCAGTGCTGCAGAACTGCTTGTAAAGAGA---GAAAATAATGGGAGCAGCTCCTGC  
CTGATGTCT---GAG---AGCAGCAGTCCGACCCAGGCC---CCA-----AGTACT  
---CCAAT-----ACA-----TCT---TCAGAGGGTCCGATGGTCATTCAGAC  
ATCCCTTCGGTCACCAGCAGAGGGCACCTGGAGAACACATCTGACCTGGTCTCAGATTCC  
ACCTATTACGGCAGTTTTTACCAGCCCTCTCTTTCCATACTACAACAAT-----  
-----CTGTACAATTATCCTCAGTATTCATGGCTTTGGCCACTGATTCCTCTTCTGGG  
---GAAATGGGGAGCACACTTGGGGGATCCCAGTGAAAAACAGCCTTCGGAGCCTACCA  
GCAACTTATGTGTCTGGCCAGTCAGGAAACCAGTGGCAGATGAAGAACACCGAGAATCGT  
-----CAT-----GCCATGGGTTCAGTACAGGATGCATTCTTATTATCCTGCG  
ACTTCATACCTGAGCCAGAGTGTGTACAG-----ATTTTCGCTTTT  
GAAGATAGCCCTTCTTATTCTGAAGCCAAAGCAAGT

>*Rattus\_norvegicus*

TGCCAGTGCAAGAAGTGAGCCTGATTGCCGAGCGACAGCGGGTGCATGGCCGCGCAGGTG  
---GCCCTGAGAAGACAGCAGGCCAGGAAGAGGAGCTGGGCATCAGCCACCCCATTCGG  
CTGCCAGCGCAGCAGAGCTGCTGGTCAAAAGA---GAGAATAGTGCCAGCAACCCGTGC  
CTGATGGCT---GAG---AGCAGCAGCTCGGCCAGGCC---CCA---CCGGCCAGCACC  
---CCAACC-----CCC-----ACTGTCTCAGAGGGACGCATGGTCATCCAGGAT  
ATCCCTGCTGTCACCAGCAGAGGGCACATGGAGAACGCACCTGACCTGATGTCAGACCCC  
GCCTACTACAGCAGCTTTTACCAGCCGTCTCTGTTTCTTACTACAACAAT-----  
-----CTGTACAATACCCCCAGTACTCCATGGCCTTGTCTGCTGAGTCCCTCCTCAGGG  
---GACGTGGGAAATCCCCTTGGGGGATCCCCTGTGAAGAACAGCCTGCGTAGTCTCCCA  
GCACCTTATGTGCTGCTCAGACTGGAAACCAGTGGCAGATGAAGACCTCAGAGGGCCGC  
-----CAC-----CCAGTGAGCTCCAGTACCGGATGCACTCATACTATGGGCCT  
CCCTCCTACCTGGGTGAGAGCATGTCCCAG-----ATCTTTACCTTT  
GAGGAAGGCCCTCCTACTCAGAAGCCAAAGCAAGT

>*Felis\_catus*

TGCCAGTGCAAGAAGTGCAACCTGATCGCCGAGAGACAGCGGTGATGGCCGCGCAGGTG  
---GCCCTGAGAAGGCAGCAGGCCAGGAAGAGGAGCTGGGGATCAGCCACCCCATCCCG  
CTCCCAGCGCTGCCGAAGTGTGTCAAGAGA---GAGAGCAATGGCAACAACCCGTGC  
CTGATGACC---GAG---AGCAGCAGCCCCTCGAGCCG---GGG---CCGGCCAGCACC  
---CCCACC-----ACT-----GCCGCATCAGAGGGACGCATGGTCATCCAGGAT  
ATTCTGCGCTCACCAGCAGAGGGCACATGGAGAACACACCTGATCTGGTTTCTGACTCC  
ACCTACTACAGCAGCTTTTACCAGCCTTCTCTGTTCCCTTACTACAACAAT-----  
-----CTGTACAATACCCGCAGTACTCCATGGCCTTGGCCGCGGATTCCTCTTCCGGG  
---GATGTGGGAAACCCCTCGGGGGTCCCCTGTGAAGAACAGCCTGCGGAGCCTCCCG  
GCACCTACGTGCCAGTCAGCCGGGAAACCAGTGGCAGATGAAGAACCTCGGAGAACC GC  
-----CAC-----CCAATGAGCTCGCAGTACAGAATGCATTCTTACTACCCGCCT  
CCCTCCTACCTGGGCCAGAGCGTGTCCCAG-----ATCTTCACTTTT  
GAGGACGGCCCCCTTACTCGGAAGCCAAAGCAAGC

>*Loxodonta\_africana*

TGCCTCCCCAGGTCCTGCTCGTCTTTTCTTCAAGGCCCTGCCAACACCACCTCTGGTG  
---GCCCTGAGGAGGCAGCAGGCCAGGAGGAGGAGCTGGGGATCAGCCACCCCATCCCG  
CTGCCAGCGCAGCCGAGCTGCTGGTCAAGAGA---GAGAACAGCGGCAGCAACCCGTGC  
CTGATGACC---GAG---AGCAGCGGCTCCTCGAGCCC---CCGGTGCCGGCCAGCACC  
---CCCACC-----ACC-----GCGGCCTCAGAGGGACGGATGGTCATCCAGGAT  
ATCCCTGCGGCCACCAGCAGAGGGCACGTGGAGAACACGCCCGACCTGGTTTCTGACCCC  
ACCTACTACAGCAGCTTCTACCAGCCCTCGCTGTTCCCTTACTACAACAAC-----  
-----CTGTACAATACCCGCAGTACTCCATGGCCTTGGCCGCCGACTCCTCGTCCGGG

---GACGTGGGGAGCTCCCTCGGGGGTCCCCTGTGAAGAACAGCCTGCGGAGCCTCCCG  
ACACCTTATGTGCCTGGCCAGACGGGAAACCAGTGGCAGATGAAGAACGCAGAGAGCCGC  
-----CAT-----GCCATGAATTCCCAGTACAGGATGCATTCTACTATCCGCCT  
CCCTCATACTGGGCCAGAGTGTCTCCCAG-----ATCTTCACCTTT  
GAGGACGGCCCTCCTACTCGGAAGCCAAGGCCAGT

>Orycteropus\_afer

TGCCAGTGCAAGAAGTGCAACCTGATCGCTGAAAGGCAGCGGTGATGGCCGCGCAGGTG  
---GCCTTGAGGAGGCAGCAGGCCAGGAGGAGGAGCTGGGGATCAGCCACCCCATCCCG  
CTGCCTAGCGCTGCCGAGCTGCTGGTCAAGAGG---GAGAACGGCGGGCGGCAACCCGTGC  
TTGATGACC---GAG---AGCAGTGGCTCCTCACAGCCG---CCGGTGCCACCCAGCACC  
---CCCACC-----ACT-----GCAGCCTCAGAGGGACGGATGGCCATCCAGGAT  
ATCCCTGCTGCCACCAGCAGAGGGCACATGGAGAACGCACCCGACCTGGTTCCTGACTCC  
ACCTACTACAGCAGCTTCTACCAGCCGTCTCTGTTCCCTTACTACAACAAC-----  
-----CTGTACAATACCCACAGTACTCCATGGCCCTGGCCACTGACTCCTCACACGGG  
---GACATGGGGAATCCCCTTGGGGGGTCCCCTGTGAAGAATAGCCTGCGGAACCTGCCG  
GCAACTTATGTGCCTGGTCAGACAGGAAACCAGTGGCAGATGAAGGGTGCAGAGAGCCGC  
-----CACACT---ACCATGGGTCCCAGTACCGGATGCATTCTACTACCCACCG  
CCCTCCTACCTGGGCCAGAGCTCTCCCCG-----ATCTTCTCCTTT  
GAAGAAGGCCCTGCCTACCCGGAACGAAAGGCCAGT

>Xenopus\_tropicalis

TGCCAGTGCAAAAAGTGCAGTCTGATAGCAGAGAGACAGCGGGTTATGGCAGCACAGGTT  
---GCATTGCGAAGACAGCAAGCCCAGGAAGAGGAGCTGGGAATAAGCCATCCTATTCT  
TTGCCCATTCAGCTGAGTTGTTGATAAAAACGG---GAGCATGGTGGTAGCAGCTCTTGC  
CTGATGCTG---GAA---AGC---AGTTCACACAGACA---ACT-----AGCACA  
---TCTACTTCAGGTTCCACA-----ACCAGTTCAGAAGGCAAGATGTTAATTCAGAA  
ATCCCTTCCATCACCAGCAGAGGGCATCTGGAGAGCACATCTGATTTGGTTATGGACTCC  
CCTTACTACAGTAATTTCTACCAACCTCCACTTTATCCGTAATAACAAC-----  
-----CTCTACAATTACCCTCCATACCAAATGGCTGTGGCTACTGAATCTACCAGTGGC  
AATGACATGGGAGGAATA---AGTGGCCATCAATGAAAATAGTCACAGAAACCATCCA  
GCTGCTTATGTCCCTAGCCAGTCAGGAAATCAGTGGCAGATGAAGAATGGAGAGAATCGT  
TTCCCGGGTCAC-----AGTGCAAGCTCTCAATTTTCGCATGCATTCTACTATCCCCCT  
-----TATCTGGGACAGAGTGTACCCAACCCAGTTTGTGTTCCACCATTCCTCACTTTT  
GAAGAGATCCCATCATATTCTGAGGCGAAGGCAAGT

>Xenopus\_laevis

TGCCAGTGCAAAAAGTGCAGTCTGATAGCAGAGAGACAACCGGGTTATGGCAGCACAGGTT  
---GCATTGCGAAGACAGCAAGCCCAGGAAGAGGAGCTGGGAATAAGCCATCCAATCCAT  
TTGCCCATTCAGCTGAGTTGCTGATAAAAAAG---GAGCATGGTGGTAGCAGCTCTTGC  
TTGATGCTG---GAA---AAC---AGTCTACACAGACA---ACC-----AGCACA  
---CCCCTTCAGGTTCCACA-----GCCAGTTCAGAAGGCAAGGTGTTAATTCAGAA  
ATCCCTTCCATCACCAGCAGAGGGCATATGGAGAGCACATCTGATTTGGTTATGGACTCC  
CCTTACTACAGTAATTTCTACCAACCTCCACTTTATCCGTAATAACAAC-----  
-----CTGTACAATTACCCTCCATACCAAATGGCTATGGCTGCTGAATCTACCAGTGGC  
AATGATATGGGAGGAATA---AGCGGGCCGCCACTAAAAATAATCACAGAAACCATCCA  
GCTGCTTATGTCCCTAGCCAGTCAGGAAATCAGTGGCAGATGAAGAATAGAGAGAATCGT  
TTCCAGGTCAC-----AGCGGAAGCTCACAATTTCCGATGCATTCTACTATCCCCCT  
-----TATCTGGGACAGAGTGTACCAAACCCAGCTTGTGTCCACCATTCCTCACTTTT  
GAAGAGATTCATCTTATTCTGAGGCAAAGGCAAGT

>Podarcis\_siculus

-----GTT  
---GCACTGAGAAGGCAGCAAGCCCAAGAAGAAGAGTTGGGAATCAGTCACCCCATCCCA  
TTGCCG-----GAACCACTTGTCAAGAAA---GAGAGCAACTCCGGCGGCACCTGC  
CTTCTGTTG---GAA---GGGAACAGCCCAACTCCTTCG---ACC-----TCCACG  
---GCAACTGCAGGATCAACT-----GCACCAACA-----  
-----  
-----



ACCTACTACAGCAGTTTTTTACCAGCCATCCCTGTATCCTTACTACAACAAC-----  
-----CTTTACAACACTACTCCCCATAACCAGATGGCAGTGGCCAGTGAATCCTCCTCTAGT  
---GATATGGGAGGCACACTAGTAGGGTCCCCGTGAAAAACAGCCTGCGAAGCCTCCCA  
GCCACATATATG-----  
-----  
-----  
-----

>Staurotypus\_triporcatus

-----  
-----  
CTGCCTAGTGCCCCAGAGCTCTTTCGTTGAGAAG---GAGAACAATGGTGGCAGCTCCTGC  
TTATTGTTG---GAT---GGCAGCAGCCCGACACATTCC---ACA-----AACACA  
---GCAACTACAGCATCCAGC-----ACCCCATCA-----  
-----  
-----  
-----  
-----  
-----  
-----

>Apalone\_mutica

-----AGCCTGATCGCCGAGAGGCAGCGGGTGATGGCAGCCCAGGTT  
---GCATTGAGAAGGCAGCAGGCCCAAGAAGAAGAGCTGGGAATCAGCCATCCCATCCCT  
CTGCCAGTGCCCCAGAGCTCTTTGTAAAGAAG---GAAAACAATGGTGGCAGCTCCTGT  
TTATTGTTG---GAA---AGCAGCAGCCCGACACATTCA---ACA-----AACACA  
---GCAACTACGGCATCCAGC-----ACCCCGGCAGAGGGACGGATGCTCATTCAGGAC  
ATTCTTCCATCACCAGCAGAGGGCATCTGGAGAGCACATCTGACTTGGTTGTGACTCC  
ACCTACTACAGCAGTTTTTTACCAGCCATCCCTGTATCCTTATTACAACAAC-----  
-----CTTTACAACACTACTCCCAGTACCAGATGGCAGTGGCCAGTGAATCCTCCTCTAGT  
---GATATGGGGGGGCACACTAGTAGGGTCCCCGTGAAAAACAGCCTCCGAAGCCTCCCA  
GCCACATATATG-----  
-----  
-----  
-----

>Pelodiscus\_sinensis

TGCCAGTGTAATAAATGCAGCCTGATCGCCGAGAGGCAGCGGGTGATGGCAGCCCAGGTT  
---GCATTGAGAAGGCAGCAGGCCCAAGAAGAAGAGCTGGGGATCAGCCATCCCATCCCT  
CTGCCAGTGCCCCAGAGCTCTTTGTAAAGAAG---GAAAACAATGGTGGCAGCTCCTGT  
TTATTGTTG---GAA---AGCAGCAGCCCGACACATTCA---ACA-----AACACG  
---GCAACTACGGCATCCAGC-----ACCCAGCAGAGGGACGGATGCTCATTCAGGAC  
ATTCTTCCATCACCAGCAGAGGGCATCTGGAGAGCACATCTGACTTGGTTGTGGACTCC  
ACCTACTACAGCAGTTTTTTACCAGCCATCCCTGTATCCTTATTACAACAAC-----  
-----CTTTACAACACTACTCCCAGTACCAGATGGCAGTGGCCAGTGAATCCTCCTCTAGT  
---GATATGGGGGGGCACACTAGTAGGGTCCCCGTGAAAAACAGCCTCCGAAGCCTCCCA  
GCTACATACATGTCAAGCCAGTCAGGAAACCAGTGGCAGATGAAAAGCACAGAGAGCCGA  
-----CAT-----GCCATGAGCTCCCCGTACAGAATGCACTCCTACTACTCTCCT  
GCTTCTACCTGGGCCAGAGTGTAGCACCCCTGCGTGTGTTCCACAGATCTTCACTTTT  
GAGGATAGCCCCCTCGTACTCCGAATCTAAAGCAAGC

>Carettochelys\_insculpta

-----  
-----  
-----CAGCAGGCCCAAGAAGAAGAGCTGGGGATCAGCCATCCCATCCCT  
CTTCCCAGTGCCCCGAGCTCTTTGTAAAGAAG---GAGAACAATGGTGGCAACTCCTGT  
TTGTTGTTG---GAA---AGCAGCAGCCAGACACATTCA---ACA-----AATACT  
---GCAACAACAGCATCCAGC-----ACCCTAGCA-----  
-----



>Podocnemis\_expansa

-----GTT  
---GCGTTAAGAAGGCAGCAGGCCCAAGAGGAAGAGCTGGGAATCAGCCATCCCATCCCT  
CTGCCAGTGCCCGTGGAGCTCTTTGTGAAGAAG---GAAAACAATGGTGGCAGCTCCTGT  
TTATTGTTG---GAA---AGTAGCAGCCCCACACATTCA---ACA-----AACACA  
---GCAACTACAGCATCCACC-----ACCGCAGCA-----

>Mauremys\_reevesii

TGTCAGTGTAATAAATGCAGCCTGATCGCAGAGCGGCAGCGGGTGATGGCTGCGCAGGTG  
---GCATTGAGAAGGCAGCAGGCCCAAGAAGAAGAGCTGGGGATCAGCCATCCCATCCCT  
CTGCCAGTGCCCGTGGAGCTCTTTGTGAAGAAG---GAAAACAATGGTGGCAGCTCCTGT  
TTATTGTTG---GAA---AGCAACAGCCCAACACATTCA---ACA-----AACACA  
---GCAACTACAGCGTCCACC-----ACCCCATCAGAGGGACGGATGCTCATTCAGGAC  
ATTCCCTTCCATCACCAGCAGAGGGCATCTGGAGAGCGCATCTGACTTGGTTGTGGACTCC  
ACCTACTACGGCAGTTTTTACCAGCCATCCCTGTATCCTTACTACAACAAC-----  
-----CTTTACAACTACTCCCAATACCAGATGGCAGTGGCCAGTGAATCCTCCTCTAGC  
---GAATGGGGGGCACACTATGTAGGGTCCCTGTGAAAAACAGCCTGCGACAGCTCCCA  
GCCACATATATGTCAAGCCAATCAGGAAACCAATGGCAGATGAAAAGCACAGAGAGCCGA  
-----CAT-----GCCATGAGCTCCAGTACAGGATGCACTCGTACTACCCTCCT  
GCCTCCTACCTGGGCCAGAGTGTTAGCACGCCTGCTTGTGTTCCGCAGATCTTCACTTTC  
GAGGACAGCCCCCTCGTACTCAGAGTCTAAAGCAAGC

>Emydura\_macquarii

-----GAAGAAGAGCTGGGGATCAGCCATCCCATCCCT  
CTGCCAGTGCCCGGAGCTCTTTGTGAAGAAG---GAAAACAATGGTGGCAGCTCCTGT  
TTATTGTTG---GAA---AGCAGCAGCCCGACACATTCA---ACA-----AACACA  
---GTAACTACAGCATCCAGC-----ACACCAGCA-----

>Pelomedusa\_subrufa

-----GTTAAGAAA---GAAAACAATGGTGGCAGCTCCTGT  
TTATTGTTG---GAA---AGCAACAGCCCCACACATTCA---ACA-----AACACA



CTCCTGCAG---GAC---AGCAGCAGCCCTGCTCACTCC---ACG-----AGCAGC  
GTGGCAGCAGCAGCAGCGAGC-----GCACCACCAGAGGGACGGATGCTCATTTCAGGAC  
ATCCCTTCCATCCCCAGCAGAGGGCACTTGGAGAGCACGTCTGATTTGGTTGTGGACTCC  
ACCTACTACAGCAGTTTTTTACCAGCCATCCCTGTATCCTTACTATAACAAC-----  
-----CTGTACAACACTACTCCCAGTACCAAATGGCAGTGGCCACTGAGTCTTCCTCAAGT  
---GAGACAGGGGGTACGTTTTGTAGGGTTCAGCCATGAAAAACAGCCTTCGAAGCCTCCCA  
GCAACATACATGTCAAGCCAGTCAGGAAAACAGTGGCAGATGAAAGGGATGGAGAACCGC  
-----CAT-----GCCATGAGCTCCCAGTACCGGATGTGCTCCTACTACCCGCC  
ACCTCATACCTGGGCCAGGGGGTTGGCAGTCCCACCTGCGTACACAGATACTGGCCTCG  
GAGGACACCCCTCCTACTCAGAGTCGAAAAGCGAGA

>Struthio\_camelus

-----  
---GCACTGAGACGGCAGCAGGGCGAGGAAGAGGAGCTGGGGATCAGCCACCCCATACCG  
CTGCCCAGTGCCACCGAGCTCTTCGTGAAGAAGGAG---AGCAGTGGCGGCAGCCCCTGC  
ATCCTGTGG---GAG---AGTGGCAGCCCCACGCACACC---ACC-----AGCAGC  
---GCCACCACCACCGCCAGC-----ACGCCGTCAGAGGGACGGATGCTCATTCAAGAC  
ATCCCTTCCATCCCCAGCAGAGGGCACTTGGAGAGCACGTCTGATTTGGTTGTGGACTCC  
ACCTACTACAGCAGTTTTTTACCAGCCATCCCTGTATCCTTACTATAACAAC-----  
-----CTGTACAAC-----  
-----  
-----  
-----  
-----  
-----

>Columba\_livia

-----  
GTTGCGCTGAGAAGGCAGCAAGCTCAGGAAGAGGAGCTGGGAATCAGCCACCCAGTGCCC  
CTGCCCAGCGCCCCGGAGACGTTTTGTTAAGAAG-----AACAGTGGTGGCAGCTCTTGT  
CTCTTGTG---GAA---AACAGCAGCCCTACCCACTCG---ACA-----AGCACA  
---GCCATGACGGCAGCGAGC-----ACAGCGTCAGAGGGACGGATGCTCATTTCAGGAC  
ATCCCTTCCATCCCCAGCAGAGGGCACTTGGAGAGCACGTCTGATTTGGTTGTGGACTCC  
ACCTACTACAGCAGTTTTTTACCAGCCATCCCTGTATCCTTACTATAACAAC-----  
-----CTGTACAACACTACTCCCAGTATCAAATGGCAGTGGCCAGTGAAGCCTTCTTCAAGT  
---GAGACGGGGGGTACGATTGTAGGGTTCGGCCATGAAAAACAGCCTTCGAAGCCTCCCA  
GCAACATACATGCAAACCCAGTCGGGAAAACAGTGGCAGGTGAAGGGCATGGAGAGCCGC  
-----CAC-----GCCGTCAGCTCCCAGTACCGCATGTGCTCCTACTACCCACCC  
GCTTCCCTACCTGGGACAGGGGGTTGGAGCTCCCACGTGCCTCCCCCAAATCTTGACCTCT  
GAGGATGTCCCTTCCCTACTCGGAGTCGAAAAGCAAGA

>Ficedula\_albicollis

-----GTT  
---GCACTAAGAAGACAGCAAGCTCAGGAAGAGGAGCTGGGAATCAGCCACCCAGTGCCC  
TTGCCCAGTGTCCTGAGACATTTGTTAAGAAG-----AACAGTGGTGGCAGCTCTTGC  
CTCTCTCTG---GAA---GGCAGCAGCCCAATGCACTCG---ACA-----AGCACA  
---GCCATGACAGCAGCTAGT-----ACACCACCAGAGGGACGGATGCTCATTTCAGGAC  
ATCCCTTCCATCCCCAGCAGAGGGCACTTGGAGAGCACGTCTGAGTTGGTTGTGGACTCC  
GCCTACTACAGCAGTTTTTTACCAGCCGTCCTGTATCCTTGTTACAACAAC-----  
-----CTGTACAACACTACTCCCAGTACCAGATGGCAGTGGCCAGTGAAGCCTTCTTCAAGT  
---GAGACAGGGGGTACGATTGTAGGGTTCGGCCATGAAGAACAGCCTTCGAAGTCTCCCA  
GCAACATACATGCCGAGCCAGTACGAAAACAGTGGCAGGTGAAGGGCATGGAGAGACAC  
-----CAC-----GCTGTGAGCTCCCAGTACCGGATGTGTTCTTACTACCCACCT  
GCTTCCCTACCTGGGACAGGGGGTTGGCGCTCCCAGTGCCTCCCCAGATCCTGGCCTCT  
GAGGACATCCCTCCTCCTCGGAGTCAAAAAGCAAGA

>Geospiza\_fortis

-----GTT  
---GCCCTAAGAAGACAGCAAGCTCAGGAAGAGGAAGTGGGAATCAGCCACCCAGTGCCCT

CTGCCAGTGTCCCTGAGACGTTTGTAAAGAAG-----AACAGTGGTGGCAACTCTTGC  
CTCTCACTG---GAA---AGCAGCAGCCAATGCACTCG---ACA-----AGTACA  
---GCCATGACAGCAGCTAGT-----ACACCGCCAGAGGGACGGATGCTCATTTCAGGAC  
ATCCCTTCCATCCCCAGCAGAGGGCACTTGGAGAGCACATCTGAGTTGGTTGTGGACTCC  
GCCTACTACAGCAGTTTTTTACCAGCCATCTCTGTATCCTTGCTATAACAAC-----  
-----CTGTGCAACTATTCCCAGTACCAGATGGCAGTGGCCAGTGAGCCTTCCTCAAGT  
---GAGACAGGGGTACAATTGTAGGGTTCGGCCATGAAGAACAGCCTTCGAAGTCTCCCA  
GCAACATACATGCCGAGCCAGTCAGGAAAACAGTGGCAGGTGAAGGGCATGGAGAGACAC  
-----CAC-----GCCGTACAGCTCCAGTACCGCATGTGTTCCCTACTACCCACCT  
GCTTCTTACCTGGGACAGGGGGTTGGCGCTCCCATGTGCCTCCCCAAATCCTGACCTCT  
GAGGACATCCCCTCCTCCTCAGAGTCAAAAAGCCAGA

>Zonotrichia\_albicollis

-----GTT  
---GCCCTAAGAAGACAGCAAGCTCAGGAAGAGGAGCTGGGAATCAGCCACCCGGTGCCC  
CTGCCAGTGTCCCTGAGACGTTTGTAAAGAAG-----AACAGTGGTGGCAATTCTTGC  
CTCTCGCTG---GAA---AGCAGCAGCCAATGCACTCG---ACA-----AGTACA  
---GCCATGACAGCAGCTAGT-----ACACCACAGAGGGACGGATGCTCATTTCAGGAC  
ATCCCTTCCATCCCCAGCAGAGGGCACTTGGAGAGCACATCTGAGTTGGTTGTGGACTCC  
GCCTACTACAGCAGTTTTTTACCAGCCATCTCTGTATCCTTGTTATAACAAC-----  
-----CTGTACAATACTCCCAGTACCAGTGGCAGTGGCCAGTGAGCCTTCCTCCAGT  
---GAGACAGGGGGCACAATTGTAGGGTTCGGCCATGAAGAACAGCCTTCGAAGTCTCCCA  
GCAACATACATGCCGAGCCAGTCAGGAAAACAGTGGCAGGTGAAGGGCATGGAGAGACAC  
-----CAC-----ACCGTACAGCTCCAGTACCGCATGTGTTCCCTACTACCCACCT  
GCTTCCCTACCTGGGACAGGGGGTTGGCGCTCCCATGTGCCTCCCCAAATCCTGACCTCT  
GAGGACATCCCCTCCTCCTCAGAGTCAAAAAGCCAGA

>Pseudopodoces\_humilis

TGCCAGTGCACAAGTGCAGCTTGATCGCCGAGCGGCAGCGGTCATGGCAGCGCAGGTT  
---GCACTAAGAAGACAGCAAGCTCAGGAAGAGGAACTGGGAATCAGCCACCCGTGTC  
CTGCCAGTGTCCCTGAGACGTTTGTAAAGAAG-----AACAGTGGTGGCAGCTCTTGC  
CTCTCGCTG---GAA---AGCAGCAGCCAATGCACTCG---ACA-----AGTACA  
---GCCATGACAGCAGCTAGT-----ACACCACGGAGGGACGGATGCTCGTTCAGGAC  
ATCCCTTCCATCCCCAGCAGAGGGCACTTGGAGAGCACATCTGAGCTGGTTGTGGACTCC  
GCCTACTACAGCAGTTTTTTACCAACCGTCCCTGTATCCTTGTTATAACAAC-----  
-----CTGTACAATTACTCCCAATAACCAGATGGCAGTGGCCAGTGAGCCTTCCTCAAGT  
---GAGACGGGGGGTACAATTGTAGGGTTCGGCCATGAAGAACAGCCTTCGAAGTCTCCCA  
GCAACATACATGCCGAGCCAGTCAGGAAAACAGTGGCAGGTGAAAGGCATGGAGAGACAC  
-----CAT-----GCCGTACAGCTCCAGTACCGCATGTGCTCCTACTACCCACCT  
GCCTCCTACTTGGGACAGGGGGTTGGTGCTCCCATGTGCCTACCCAAATCCTGACCTCT  
GAGGACATCCCCTCCTCCTCGGAGTCAAAAAGCAAGA

>Falco\_peregrinus

-----GTT  
---GCACTGAGAAGGCAGCAAGCTCAGGAAGAGGAACTGGGAATCAGCTGCCC GCGGCC  
CTGCCAGTGTCCCTGAGGTGTTTCGTTAAGAAG-----AACAGCGGTGGCAGCTCTTGT  
CCCCTGTTG---GAAGGCAGCAGCAGCCCTCTGCATTTCG---ACG-----AGTACA  
---GCCACGACAGCAACCAGC-----ACACCATCAGAGGGACGGATGGTCATTTCAGGAC  
ATCCCTTCCATCCCCAGCAGAGGGCACTTGGAGAGCACATCTGATTTGGTTGTGGAGTCC  
CCCTACTACAGCGTTTTTTACCAGCCGTCCTGTATCCTTACTATAACAAC-----  
-----CTGTACAATACTCCCAGTACCAAAATGGCAGTGGCCGTTGAGCCTTCCTCAAGT  
---GAGGCGGAGGGTATGATTCTAGGTCGGCCATGAAAAACAGCCTTCGAAGCCTCCCA  
GCAGCATAACATGCCAAGCCAGTCAGGAAAACAGTGGCAGGTAAAAGGCATGGAGAACCAC  
-----CAA-----GCCATCAGCTCCAGTATCGCATGTGCTCCTACTACCCACCT  
GCTTCCCTACCTGGGACAGGGGGTTGGCACTCCACATGCGTTACCCAAATCCTGACTTCT  
GAGGATGTCCCCTCCTACTTGGATTCAAAAAGTGAGA

>Alligator\_mississippiensis

-----AGCCTGATCGCTGAGAGGCAGCGGGTGATGGCAGCCCAGGTT

---GCTTTAAGGAGGCAGCAGGCTCAAGAAGAGGAACTAGGGATCAGCCACCCAATCCCT  
CTGCCCAGTGCCACAGAGCTCTTTGTTAAGAAG---GAAAACAGTGGTGGAAGCTCCTGT  
TTGCTGTTG---GAA---AGCAGCAGCCCAACTCACTCA---ACA-----AGCACG  
---GTGACTACAGTGTCCACC-----TCACCATCAGAGGGACGGATGCTTATTCAGGAT  
GTTCCCTCCATCACCAGCAGAGGGCATCTGGAGAGCACATCTGACTTGGC-----  
-----  
-----  
-----  
-----  
-----  
-----  
-----  
-----  
-----

>Gavialis\_gangeticus

-----GTG  
---GCTCTAAGGAGGCAACAGGCTCAAGAAGAGGAACTAGGGATCAGCCACCCAATCCCT  
CTGCCCAGTGCCACTGAGCTCTTTGTTAAGAAG---GAAAACAGTGGTGGAAGCTCCTGT  
TTGCTGTTG---GAA---AGCAGCAGCCCAACTCACTCA---ACA-----AGCACA  
---GTGACTACAGTGTCCACC-----TCGCCATCA-----  
-----  
-----  
-----  
-----  
-----  
-----  
-----  
-----  
-----

>Alligator\_sinensis

TGCCAGTGCAAAAAGTGCAGCCTGATCGCTGAGAGGCAGCGGGTATGGCAGCCCAGGTG  
---GCTTTAAGGAGGCAGCAGGCTCAAGAAGAGGAACTAGGGATCAGCCACCCAATCCCT  
CTGCCCAGTGCCACAGAGCTCTTTGTTAAGAAG---GAAAACAGTGGTGGAAGCTCCTGT  
TTGCTGTTG---GAA---AGCAGCAGCCCAACTCACTCA---ACA-----AGCACA  
---GTGACTACAGTGTCCACC-----TCACCATCAGAGGGACGGATGCTTATTCAGGAC  
GTTCCCTCCATCACCAGCAGAGGGCATCTGGAGAGCACGTCTGACTTGTCGTGGACTCC  
ACCTACTACAGCAGTTTCTATCAGCCATCCCTGTATCCTTACTACAACAAC-----  
-----CTGTACAACACTCCCAATACCAGATGGCTGTGGCCAGTGAATCTTCCTCAAGT  
---GAGATGGGGGGTTTCATTAGTAGGCTCACCTGTGAAAACAGCCTACGAAGCCTACCC  
GCCACATATATGTCAAGCCAGTCAGGAAACCAGTGGCAGGTAAAGAGCTCCGAGAACC GC  
-----CAT-----GCCATGGGCTCTCAGTACAGGATGCACTCTTACTACCCACCT  
GCTCCATACCTGGGCCAGAGTGTGGAAACCCCTGCATGTGTTCCGCAGATCTTCACTTTT  
GAGGACAGCCCTTCATACTCCGAATCAAAAAGCCAGA

>Crocodylus\_palustris

TGCCAGTGCAAAAAGTGCAGCCTGATCGCCGAGAGGCAGCGGGTATGGCAGCCCAGGTG  
---GCTTTAAGGAGGCAGCAGGCTCAAGAAGAGGAACTAGGGATCAGCCACCCAGTCCCT  
CTGCCCAGTGCCACTGAGCTCCTTGTAAAGAAG---GAAAACAGTGGTGGAAGCTCCTGT  
TTGCTGTTG---GAA---AGCAGCAGCCCAACTCACTCA---ACA-----AGCACA  
---GTGACTACAGTGTCCACC-----TCGCCATCAGAGGGACGGATGCTTATTCAGGAC  
ATTCCCTCCATCACCAGCAGAGGGCATCTGGAGAGCACGTCTGACTTGTCGTGGACTCC  
ACCTACTACAGCAGTTTCTATCAGCCATCCCTGTATCCTTACTACAACAAC-----  
-----CTGTACAACACTCCCAATACCAGATGGCTGTGGCCAGTGAATCTTCCTCAAGT  
---GAGATGGGGGGTTTCATTAGTAGGCTCACCTGTGAAAATAGCCTTCAAGCCTACCC  
GCCACGTATATGTCAAGCCAGTCAGGAAACCAGTGGCAGGTAAAGAGCTCCGAGAACC GT  
-----CAT-----GCCATGGGCTCTCAGTACAGGATGCACTCTTACTACCCACCT  
GCTCCCTACCTGGGCCAGAGTGTGGAACTCCTGCATGTGTTCCCTCAGATCTTCACTTTT  
GAGGACAGTCCCTTCATACTCCGAATCAAAAAGCCAGT
