# Supplementary material
Source: PubMed Central journal article supplement (PMC4298190)
Supplement: rsbl20140809supp3.pdf [file rsbl20140809supp3.pdf]

>Python

-----SSC  
-LLE-STSPQS-T---TT-ATVVST--SST-----  
-----  
-----

>Python\_regius

-----SATEMYVKK-ENNANSSC  
-LLE-STSPQS-T---TT-ATVVST--SST-----  
-----  
-----

>Trimeresurus\_flavoviridis

CQCKKCSLIAERQVMAAQV-ALRRQQAQEEELGISHPIPLPSATEMYVKK-ENNANSSC  
-LL-E-STSPQS-T---TT-ATVVST--SSTEGRMLIQDIPSLASRGHLESTSDLVMDP  
TYYSYLYQPSLYPYNN-----LYNYSQYQMAVATETTSG-DMGSPLTGSPVKSSLRSLP  
TTYMSSQSGNQWQVKSPEGR---H--SLSSQYRMHSYYPSSSYLGQSVGGPACVPQIFTF  
EENPSYSETKTN

>Elaphe\_quadrivirgata

CQCKKCSLIAERQVMAAQV-ALRRQQAQEEELGISHPIPLPSATEMYVKK-ENNANSSC  
-LL-E-STSPQS-T---TT-ATVVST--SSTEGRMLIQDIPSLASRGHLESTSDLVMDP  
TYYSYLYQPSLYPYNN-----LYNYSQYQMAVATETTSG-DMGSPLSGSPVKSSLRSLP  
TTYMSSQSGNQWQVKSPEGR---H--SLSSQYRMHSYYPSSSYLGQSVGAPACVPQIFTF  
EENPSYSDTKAN

>Notechis\_scutatus

CQCKKCSLIAERQVMAAQV-ALRRQQAQEEELGISHPIPLPSTTEMYVKK-ENNANSSC  
-LL-E-STSPQS-T---TT-ATVVST--SSTEGRMLIQDIPSLASRGHLESTSDLVMDP  
TYYSYLYQPSLYPYNN-----LYNYSQYQMAVATETTSG-DMGSPLTGSPVKSSLRSLP  
TTYMSSQSGNQWQVKNPEGR---H--SLSSQYRMHSYYPSSSYLGQSVGAPACVPQIFTF  
EENPSYSETKAN

>Ctenotus\_taenioulatus

-----EVYVKK-ENNANGSC  
LLL-E-SSSPQSTT---A-ATTASA--SST-----  
-----  
-----

>Eulamprus\_quoyii

-----EVYVKK-ESNANGSC  
LLL-E-SSSPQSTT---A-ATTASA--SST-----  
-----  
-----

>Eublepharis\_macularius

-----SATEMYVKK-ESNANGSC  
LLM-E-SGSPTQSTT---TM-AATGSA--SVT-----  
-----  
-----

>Gekko\_hokouensis

-----ALRRQQAQEEELGISHPIPLPSATEMYMKK-ENNANGSC  
LLL-E-SSSPQSTT---TT-ATSGAA--SSTEGRMLMQDIPSLSSRGHLESTSDLVVDV  
TYYSYFYQP-LYPYNN-----LYNYSQYQMAVSSSETTSG-DMGSSLVGSPAKNSLRSLP  
ATYMSSQSGNQWQVKSPPDSR---H--GMSSQYRMHTYYPPTSYLGQSVGTPACVPQILTF  
EESPSFSETKAS

>Calotes\_versicolor

CQCKKCSLIAERQVRMAAQV-ALRRQQAQEEELGISHPIPLP---EMYVKK-ESNASGTC  
LVL-E-GGSPPPS-T---ST-ATAGSS--AATEGRMLIPDLPSLSSRGHLESTSDLVVDS  
TYYSSFYQPSLYPYNN-----LYNYSQYQMAVASESTSG-EMGSPLVGSPVKNSLRSLP  
ATYMSSQSGNQWQVKS PDNR---H--AMGSQYRMHSY-----  
-----

>Pogona\_vitticeps

CQCKKCSLIAERQVRMAAQV-ALRRQQAQEEELGISHPIPLP---EMYVKK-ESNASGTC  
LVL-E-SGSPPPS-T---SS-ATAGSS--ATTEGRMLIPDIPSLSSRGHLESTSDLVVDS  
TYYSSFYQPSLYPYNN-----LYNYSQYQMAVASETTSG-EMGSPLVGSSVKNSLRSLP  
ATYMSSQSGNQWQVKS PDNR---H--GVSSQYRMHSYYPSTPYLGQNVGAPACVPQIFTF  
EESPPYSEAKAN

>Leiolepis\_reevesii

-----ALRRQQAQEEELGISLPIPLP---EMYVKK-ENSSSGTC  
LVL-E-NGSPPHS-S---SS-AAASSA--TTEGRMLIPDIPSLSSRGHLESTSDLVVDS  
TYYSSFYQPSLYPYNN-----LYNYSQYQMAVASETTSG-DMGSSLVGSPVKNSLRSLP  
ATYMSSQSGSQWQVKS PDGR---H--GVSSQYRMHSYYPSTSYLGQNVGAPACVPQIFTF  
EESPSYSETKAS

>Anolis\_carolinensis

CQCKKCSLIAERQVRMAAQV-ALRRQQAQEEELGISHPIPLPNATEMYVKK-EGSANGSC  
LLL-E-SSSPQOS-T---TA-ATTVSS--ASTEGRMLIQDIPSLASRGHLESTSDLVVDS  
TYYSSFYQPSLYPYNN-----LYNYSQYQMAVASETTSG-DMGSPLVGSPVKNSLRSLP  
TTYMSSQSGNQWQVKS PENR---H--GVSSQYRMHSYYPSTSYLGQSVGGPACVPQIFTF  
EESSYSETKAN

>Aspidoscelis\_inornata

CRCEKCILIAERQVRMAAQV-ALRRQQAQEEELGISHLIPLPSATEKFKVKK-ENSTNGSC  
LQL-D-NSSPPQ-----T-ATTGSG--SSAEGRMLIQDIPSLTSRGHLESTSDLVVD-  
--YSSFYQPSLYPYNNYSQYQMYSYSQYQMAMASETTSG-DVGSPLVGSPVKNSLRSLP  
STYMPSQSGNQWQMKTMENR-----  
-----

>Sphenodon\_punctatus

CQCEKCRILIAERQVRMAAQV-ALRRQQAQEEEMGINRPVPLTSATEMYVEK-EENGRSSC  
LLL-K-TSSPTQS-T---NT-ATTVSTVPS---GRMLIQDIPSI TSRGHLESTSDLVVDS  
TYYSSFYQPSLYPYNN-----LYNYPQYQMAVATDSSSS-DLGSTLVGSPVKNSLRSLP  
ATYMSSQSGNQWQVKS PESR---H--AAMGSQYRMHSYYPASYLGQSVGGPTCVPQIFTF  
EESPSYSESKAN

>Monodelphis\_domestica

CQCKKCNLIAERQVRMAAQV-ALRRQQAQEEELGISHPIPLPSAAELLVKR-ENNGSSSC  
LMS-E-SSSPTQA-P---ST-PT---T--S--SEGRMVIQDIPSVTSRGHLENTSDLVSDS  
TYYGsfyQPSLFPYNN-----LYNYPQYSMALAADSSSG-EMGSTLGGSPVKNSLRSLP  
ATYVSGQSGNQWQMKNTENR---H--GMGSQYRMHSYYPATSYLSQSVSQ-----IFAF  
EDSPSYSEAKAS

>Sarcophilus\_harrisii

CQCKKCNLIAERQVRMAAQV-ALRRQQAQEEELGISHPIPLPSAAELLVKR-ENNGSSSC  
LMS-E-SSSPTQA-P---ST-PT---T--S--SEGRMVIQDIPSVTSRGHLENTSDLVSDS  
TYYGsfyQPSLFPYNN-----LYNYPQYSMALATDSSSG-EMGSTLGGSPVKNSLRSLP  
ATYVSGQSGNQWQMKNTENR---H--AMGSQYRMHSYYPATSYLSQSVSQ-----IFAF  
EDSPSYSEAKAS

>Rattus\_norvegicus

CQCKKCSLIAERQVRMAAQV-ALRRQQAQEEELGISHPIPLPSAAELLVKR-ENSASNPC  
LMA-E-SSSSAQ-P-PAST-PT---P--TVSEGRMVIQDIPAVTSRGHMENAPDLMSDP  
AYYSSFYQPSLFPYNN-----LYNYPQYSMALSAESSSG-DVGNPLGGSPVKNSLRSLP  
APYVPAQTGNQWQMKTSEGR---H--PVSSQYRMHSYYPSSYLGQSMSQ-----IFTF  
EEGSPSYSEAKAS

>Felis\_catus

CQCKKCNLIAERQVRMAAQV-ALRRQQAQEEELGISHPIPLPSAAELLVKR-ESNGNNPC

LMT-E-SSSPSQ-G-PAST-PT---T--AASEGRMVIQDIPAVTSRGHMENTPDLVSDS  
TYYSFFYQPSLFPYNN-----LYNYPQYSMALAADSSSG-DVGNPLGGSPVKNSLRSLP  
APYVPSQPGNQWQMKNSENR---H--PMSSQYRMHSYPPPSYLGQSVSQ-----IFTF  
EDGPSYSEAKAS

>Loxodonta\_africana

CLPRSCSSFSRRCPTPLV-ALRRQQAQEEELGISHPIPLPSAAELLVKR-ENSGSNPC  
LMT-E-SSGSSQP-PVPAST-PT---T--AASEGRMVIQDIPAATSRGHVENTPDLVSDP  
TYYSFFYQPSLFPYNN-----LYNYPQYSMALAADSSSG-DVGSSLGGSPVKNSLRSLP  
TPYVPGQTGNQWQMKNAESR---H--AMNSQYRMHSYPPPSYLGQSVSQ-----IFTF  
EDGPSYSEAKAS

>Orycteropus\_afer

CQCKKCNLIAERQVMAAQV-ALRRQQAQEEELGISHPIPLPSAAELLVKR-ENGGGNPC  
LMT-E-SSGSSQP-PVPPST-PT---T--AASEGRMAIQDIPAATSRGHMENAPDLVPDS  
TYYSFFYQPSLFPYNN-----LYNYPQYSMALATDSSHG-DMGNPLGGSPVKNSLRNLP  
ATYVPGQTGNQWQMKGAESR---HT-TMGSQYRMHSYPPPSYLGQSVSP-----IFSF  
EEGPAYPETKAS

>Xenopus\_tropicalis

CQCKKCSLIAERQVMAAQV-ALRRQQAQEEELGISHPIPLPIAAELLIKR-EHGGSSSC  
LML-E-S-SSTQT-T---ST-STSGST--TSSEKMLIQEIPSIITSRGHLESTSDLVMS  
PYYSNFYQPPLYPYNN-----LYNYPYQMAVATESTSGNDMGGI-SGPSMKNSHRNHP  
AAYVPSQSGNQWQMKNGENRFPGH--SASSQFRMHSYPP--YLGQSVNPVCPVPPFLTF  
EEIPSYSEAKAS

>Xenopus\_laevis

CQCKKCSLIAERQVMAAQV-ALRRQQAQEEELGISHPIHLPIAAELLIKR-EHGGSSSC  
LML-E-N-SSTQT-T---ST-PTSGST--ASSEKMLIQEIPSIITSRGHMESTSDLVMS  
PYYSNFYQPPLYPYNN-----LYNYPYQMAAAESTSGNDMGGI-SGPPLKNNHRNHP  
AAYVPSQSGNQWQMKNRENRFPGH--SGSSQFRMHSYPP--YLGQSVNPACVPPFLTF  
EEIPSYSEAKAS

>Podarcis\_siculus

-----V-ALRRQQAQEEELGISHPIPLP---EPLVKK-ESNSGGTC  
LLL-E-GNSPTPS-T---ST-ATAGST--APT-----  
-----  
-----

>Trachemys\_scripta

-----QAQEEELGISHPIPLPSAPELFVKK-ENNGGSSC  
LLL-E-SSSPTHS-T---NT-ATTAST--TPSEGRMLIQDIPSIITSRGHLESTSDLVSDS  
TYYSFFYQPSLYPYNN-----LYNYSQYQMAVASDSSSS-DMGGTLVGSPVKNSLRSLP  
ATYMSSQSGNQWQMKSTESR---H--AMSSQYRMHSYPPASYLGQSVSTPACVPQIFTF  
EDRPSYSGSKAS

>Terrapene\_carolina

-----APELFVKK-ENNGGSSC  
LLL-E-SSSPTHS-T---NT-ATTAST--TPS-----  
-----  
-----

>Malaclemys\_terrapi

-----QEELGISHPIPLPSAPELFVKK-ENNGGSSC  
LLL-E-SSSPTHS-T---NT-ATTAST--TPS-----  
-----  
-----

>Chrysemys

---KKCSLIAERQVMAAQV-ALRRQQAQEEELGISHPIPLPSAPELFVKK-ENNGGSSC  
LLL-E-SSSPTHS-T---NT-ATTAST--TPSEGRMLIQDIPSIITSRGHLESTSDLVSDS

TYYSSFYQPSLYPYNN-----LYNYSQYQMAVASDSSSS-DMGGTLVGSPVKNSLRSLP  
ATYM-----

>Staurotypus\_triporcatus

-----LPSAPELFVEK-ENNGGSSC  
LLL-D-GSSPHTS-T---NT-ATTASS--TPS-----

>Apalone\_mutica

-----SLIAERQVRMAAQV-ALRRQQAQEEELGISHPIPLPSAPELFVKK-ENNGGSSC  
LLL-E-SSSPHTS-T---NT-ATTASS--TPAEGRMLIQDIPSITSRGHLESTSDLVVDS  
TYYSSFYQPSLYPYNN-----LYNYSQYQMAVASESSSS-DMGGTLVGSPVKNSLRSLP  
ATYM-----

>Pelodiscus\_sinensis

CQCKKCSLIAERQVRMAAQV-ALRRQQAQEEELGISHPIPLPSAPELFVKK-ENNGGSSC  
LLL-E-SSSPHTS-T---NT-ATTASS--TPAEGRMLIQDIPSITSRGHLESTSDLVVDS  
TYYSSFYQPSLYPYNN-----LYNYSQYQMAVASESSSS-DMGGTLVGSPVKNSLRSLP  
ATYMSSQSGNQWQMKSTESR---H--AMSSPYRMHSYYPASYLGQSVSTPACVPQIFTF  
EDSPSYSESKAS

>Carettochelys\_insculpta

-----QQAQEEELGISHPIPLPSAPELFVKK-ENNGGNSC  
LLL-E-SSSQHTS-T---NT-ATTASS--TLA-----

>Podocnemis\_expansa

-----V-ALRRQQAQEEELGISHPIPLPSAPELFVKK-ENNGGSSC  
LLL-E-SSSPHTS-T---NT-ATTAST--TAA-----

>Mauremys\_reevesii

CQCKKCSLIAERQVRMAAQV-ALRRQQAQEEELGISHPIPLPSAPELFVKK-ENNGGSSC  
LLL-E-SNSPHTS-T---NT-ATTAST--TPSEGRMLIQDIPSITSRGHLESASDLVVDS  
TYYGSFYQPSLYPYNN-----LYNYSQYQMAVASESSSS-EWGAHYVVGSPVKNSLRQLP  
ATYMSSQSGNQWQMKSTESR---H--AMSSQYRMHSYYPASYLGQSVSTPACVPQIFTF  
EDSPSYSESKAS

>Emydura\_macquarii

-----EEELGISHPIPLPSAPELFVKK-ENNGGSSC  
LLL-E-SSSPHTS-T---NT-VTTASS--TPA-----

>Pelomedusa\_subrufa

-----VKK-ENNGGSSC  
LLL-E-SNSPHTS-T---NT-VTTAST--TPA-----

>Chelonia\_mydas

CQCKKCSLIAERQVRMAAQV-ALRRQQAQEEELGISHPIPLPSAPELFVKK-ENNGGSSC  
LLL-E-NSSPHTS-T---NT-ATTAST--TPSEGRMLIQDIPSITSRGHLESTSDLVVDS  
TYYSSFYQPSLYPYNN-----LYNYSQYQMAVASESSSS-DMGGTLVGSPVKNSLRSLP

ATYMSSQSGNQWQMKSTESR---H--AMSSQYRMHSYYPASYLQGSVSTPACVPQIFTF  
EDSPSYSESKAS

>Lepidochelys\_olivacea

-----QV-ALRRQQAQEEELGISHPIPLPSAPELQVFKK-ETNGGSSC  
LLL-E-NSSPHTS-T---NT-ATTAST--TPSEGRMLIQDIPSITSRGHLESTSDLVVDS  
TYYSSFYQPSLYPYNN-----LYNYSQYQMAVASESSSS--DMGGTLVGSVPKNSLRSLP  
ATYMSSQSGNQWQ-----  
-----G

>Meleagris

-----LVVDS  
TYYSSFYQPSLYPYNN-----LYNYSQYQMAVASEPSSS-ETGGTFVGSAMKNSLRSLP  
TTYMSSQSGKQWQMKGMENR---H--AMGSQYRMCSYYPASYLQGVGSPTCVTQILAS  
EDTPSYSESKAR

>Gallus\_gallus

CQCKKCSLIAERQVMAAQV-ALRRQQAQEEELGISHPVPLPSAPEPVVKK--SSSSSSC  
LLQ-D-SSSPAHS-T---STVAAAAAS--APPEGRMLIQDIPSIPSRGHLESTSDLVVDS  
TYYSSFYQPSLYPYNN-----LYNYSQYQMAVATESSSS-ETGGTFVGSAMKNSLRSLP  
ATYMSSQSGKQWQMKGMENR---H--AMSSQYRMCSYYPPTSYLQGVGSPTCVTQILAS  
EDTPSYSESKAR

>Struthio\_camelus

-----ALRRQQAQEEELGISHPIPLPSATELQVFKK-SSGGSPC  
ILW-E-SGSPTH-T---ST-ATTTAS--TPSEGRMLIQDIPSIPSRGHLESTSDLVVDS  
TYYSSFYQPSLYPYNN-----LYN-----  
-----

>Columba\_livia

-----VALRRQQAQEEELGISHPVPLPSAPETFVVKK--NSGGSSC  
LLL-E-NSSPHTS-T---ST-AMTAAS--TASEGRMLIQDIPSIPSRGHLESTSDLVVDS  
TYYSSFYQPSLYPYNN-----LYNYSQYQMAVASEPSSS-ETGGTIVGSAMKNSLRSLP  
ATYMQTQSGKQWQVKGMEER---H--AVSSQYRMCSYYPASYLQGVGAPMCLPQILTS  
EDVPSYSESKAR

>Ficedula\_albicollis

-----V-ALRRQQAQEEELGISHPVPLPSVPETFVVKK--NSGGSSC  
LSL-E-GSSPMHS-T---ST-AMTAAS--TPPEGRMLIQDIPSIPSRGHLESTSELVVDS  
AYYSSFYQPSLYPCYNN-----LYNYSQYQMAVASEPSSS-ETGGTIVGSAMKNSLRSLP  
ATYMPSQSGKQWQVKGMERH---H--AVSSQYRMCSYYPASYLQGVGAPMCLPQILAS  
EDIPSSSESKAR

>Geospiza\_fortis

-----V-ALRRQQAQEEELGISHPVPLPSVPETFVVKK--NSGGNSC  
LSL-E-SSSPMHS-T---ST-AMTAAS--TPPEGRMLIQDIPSIPSRGHLESTSELVVDS  
AYYSSFYQPSLYPCYNN-----LCNYSQYQMAVASEPSSS-ETGGTIVGSAMKNSLRSLP  
ATYMPSQSGKQWQVKGMERH---H--AVSSQYRMCSYYPASYLQGVGAPMCLPQILTS  
EDIPSSSESKAR

>Zonotrichia\_albicollis

-----V-ALRRQQAQEEELGISHPVPLPSVPETFVVKK--NSGGNSC  
LSL-E-SSSPMHS-T---ST-AMTAAS--TPPEGRMLIQDIPSIPSRGHLESTSELVVDS  
AYYSSFYQPSLYPCYNN-----LYNYSQYQMAVASEPSSS-ETGGTIVGSAMKNSLRSLP  
ATYMPSQSGKQWQVKGMERH---H--TVSSQYRMCSYYPASYLQGVGAPMCLPQILTS  
EDIPSSSESKAR

>Pseudopodoces\_humilis

CQCNCSLIAERQVMAAQV-ALRRQQAQEEELGISHPVPLPSVPETFVVKK--NSGGSSC  
LSL-E-SSSPMHS-T---ST-AMTAAS--TPPEGRMLVQDIPSIPSRGHLESTSELVVDS  
AYYSSFYQPSLYPCYNN-----LYNYSQYQMAVASEPSSS-ETGGTIVGSAMKNSLRSLP  
ATYMPSQSGKQWQVKGMERH---H--AVSSQYRMCSYYPASYLQGVGAPMCLPQILTS

EDIPSSSESKAR

>Falco\_peregrinus

-----V-ALRRQQAQEEELGISCPRLPSVPEVFKK--NSGGSSC  
PLL-EGSSSPLHS-T---ST-ATTATS--TPSEGRMVIQDIPSIPSRGHLESTSDLVVES  
PYYSGFYQPSLYPYNN-----LYNYSQYQMAVAGEPSSS-EAEGMILGPAMKNSLRSLP  
AAYMPSQSGKQWQVKGMENH---Q--AISSQYRMCSYYPASYLGQGVGTPTCVTQILTS  
EDVPSYLDISKVR

>Alligator\_mississippiensis

-----SLIAERQVRMAAQV-ALRRQQAQEEELGISHPIPLPSATELKVKK-ENSGGSSC  
LLL-E-SSSPHST-T---ST-VTTVST--SPSEGRMLIQDVPSITSRGHLESTSDLV---

>Gavialis\_gangeticus

-----V-ALRRQQAQEEELGISHPIPLPSATELKVKK-ENSGGSSC  
LLL-E-SSSPHST-T---ST-VTTVST--SPS-----

>Alligator\_sinensis

CQCKKSLIAERQVRMAAQV-ALRRQQAQEEELGISHPIPLPSATELKVKK-ENSGGSSC  
LLL-E-SSSPHST-T---ST-VTTVST--SPSEGRMLIQDVPSITSRGHLESTSDLVVDS  
TYYSGFYQPSLYPYNN-----LYNYSQYQMAVASESSSS-EMGGSLVGSVPKNSLRSLP  
ATYMSSQSGNQWQVKSENH---H--AMGSQYRMHSYYPAPYLGQSVGTPACVPQIFTF  
EDSPSYSESKAR

>Crocodylus\_palustris

CQCKKSLIAERQVRMAAQV-ALRRQQAQEEELGISHPVPLPSATELLVKK-ENSGGSSC  
LLL-E-SSSPHST-T---ST-VTTVST--SPSEGRMLIQDIPSITSRGHLESTSDLVVDS  
TYYSGFYQPSLYPYNN-----LYNYSQYQMAVASESSSS-EMGGSLVGSVPKNSLRSLP  
ATYMSSQSGNQWQVKSENH---H--AMGSQYRMHSYYPAPYLGQSVGTPACVPQIFTF  
EDSPSYSESKAS
